# Supplementary material for: Living with tuberculosis: a qualitative study of patients’ experiences with disease and treatment
Source: Springer Nature journal article supplement (doi:10.1186/s12889-022-14115-7), 2022-09-10
Supplement: MOESM2 [file 23474042]

## SCREENING QUESTIONS

|            |                                                                                                                                                                                                                                                                                                                                                                                                                                                                                                                                                                                                                                                                                                                                                                                                                                                                                                                                                                                                                                         |
|------------|-----------------------------------------------------------------------------------------------------------------------------------------------------------------------------------------------------------------------------------------------------------------------------------------------------------------------------------------------------------------------------------------------------------------------------------------------------------------------------------------------------------------------------------------------------------------------------------------------------------------------------------------------------------------------------------------------------------------------------------------------------------------------------------------------------------------------------------------------------------------------------------------------------------------------------------------------------------------------------------------------------------------------------------------|
| <b>S1.</b> | <p>Are you, or any member of your household, employed by the pharmaceutical industry on a full-time or part time, or is any member of your household employed by a communication or advertising industry related to pharmaceutical products?</p> <p>Yes ..... 1 <b>CLOSE</b></p> <p>No ..... 2</p>                                                                                                                                                                                                                                                                                                                                                                                                                                                                                                                                                                                                                                                                                                                                      |
| <b>S2.</b> | <p>Are you currently suffering, or have recently recovered, from tuberculosis as confirmed through diagnosis by a healthcare professional or healthcare worker?</p> <p>Yes ..... 1</p> <p>No ..... 2 <b>CLOSE</b></p> <p>Date of diagnosis<br/>_____ (MM/YY)</p> <p><b>MUST HAVE CONFIRMED DIAGNOSIS OF TB 2017 OR LATER, OTHERWISE CLOSE</b></p>                                                                                                                                                                                                                                                                                                                                                                                                                                                                                                                                                                                                                                                                                       |
| <b>S3.</b> | <p>A. What stage of treatment are you currently at for your tuberculosis?</p> <p>Not started treatment ..... 1 <b>CLOSE</b></p> <p>Currently receiving 1<sup>st</sup> treatment ..... 2</p> <p>Currently receiving 2<sup>nd</sup> treatment (or later), as my previous treatment did not work as well as expected 3</p> <p>Currently receiving 2<sup>nd</sup> treatment (or later), due to being re-infected ..... 4</p> <p>Currently receiving 2<sup>nd</sup> treatment (or later), as I suffered side effects from my previous treatment 5</p> <p>Have previously received treatment but currently on a break ..... 6</p> <p>Treatment programme completed ..... 7</p> <p><b>IF CODE 3 SELECTED, RECRUIT AS MDR/ XDR; PHYSICIAN REFERRALS TO HELP INFORM, WHERE PATIENTS ARE UNAWARE OF STATUS</b></p> <p><b>RECRUIT MIX</b></p> <p>B. <i>IF CURRENTLY TREATED (S3a_2/3/4):</i> How long have you been on treatment?</p> <p>&lt; 3 months ..... 1</p> <p>3-6 months ..... 2</p> <p>6-9 months ..... 3</p> <p>&gt;9 months ..... 4</p> |

C. IF TREATMENT PROGRAMME COMPLETED (S3a\_6): How long have you been treatment-free?

< 3 months..... 1

3-6 months ..... 2

7-12 months ..... 3

>12 months ..... 4 **CLOSE**

**MUST HAVE COMPLETED TREATMENT IN THE LAST 12 MONTHS**

**Recruiter read out:**

As part of this research, we would like to speak to people such as yourself who are representative of different types of patients suffering from TB. This may include different characteristics such as your gender, the area in which you live, any other health conditions you suffer from and your feelings towards having TB.

Therefore, the next few questions are to understand this.

**S4.** RECRUITER RECORD GENDER

Male ..... 1

Female ..... 2

Non-Binary ..... 3

**REFER TO QUOTA TABLE**

---

**S5.** To what extent do you agree or disagree with the following statements that describe how you may feel about TB?

*Please answer on a 5 point scale where 1= strongly disagree and 5 = strongly agree*

|                                                                    | <b>Strongly Disagree</b> | <b>Neutral</b> |          | <b>Strongly Agree</b> |          |
|--------------------------------------------------------------------|--------------------------|----------------|----------|-----------------------|----------|
|                                                                    | <b>1</b>                 | <b>2</b>       | <b>3</b> | <b>4</b>              | <b>5</b> |
| <i>I feel hurt how others react to knowing I have TB.</i>          |                          |                |          |                       |          |
| <i>I lose friends when I share with them that I have TB.</i>       |                          |                |          |                       |          |
| <i>I am afraid to tell my family that I have TB.</i>               |                          |                |          |                       |          |
| <i>I am afraid to tell those outside my family that I have TB.</i> |                          |                |          |                       |          |
| <i>I choose carefully who I tell about having TB</i>               |                          |                |          |                       |          |

**RECRUIT MIN n=1 SCORING >3 FOR AT LEAST 2 STATEMENTS**

|                   |                                                                                                                                                                                                                                                                   |
|-------------------|-------------------------------------------------------------------------------------------------------------------------------------------------------------------------------------------------------------------------------------------------------------------|
| <p><b>S6.</b></p> | <p>Do you suffer from any of the following conditions?</p> <p>Diabetes ..... 1</p> <p>HIV ..... 2</p> <p>Cardiovascular disease ..... 3</p> <p>Depression..... 4</p> <p>Other ..... 5</p> <p>None of the above..... 6</p> <p><b>REFER TO QUOTA TABLE</b></p>      |
| <p><b>S7.</b></p> | <p><b>CHINA ONLY:</b></p> <p>Do you currently smoke?</p> <p>Yes ..... 1</p> <p>No ..... 2</p> <p><b>MUST RECRUIT AT LEAST n=1 CURRENT SMOKER</b></p>                                                                                                              |
| <p><b>S8.</b></p> | <p><b>RUSSIA ONLY:</b></p> <p>Do you currently suffer from, or have you ever suffered from alcohol dependence?</p> <p>Yes ..... 1</p> <p>No ..... 2</p> <p><b>MUST RECRUIT AT LEAST n=1 WITH CURRENT OR PREVIOUS ALCOHOL DEPENDENCE; REFER TO QUOTA TABLE</b></p> |

|                    |                                                                                                                                                                                                                                                                                                                                                                                                                                                                                                                                                                                                                  |
|--------------------|------------------------------------------------------------------------------------------------------------------------------------------------------------------------------------------------------------------------------------------------------------------------------------------------------------------------------------------------------------------------------------------------------------------------------------------------------------------------------------------------------------------------------------------------------------------------------------------------------------------|
| <p><b>S9.</b></p>  | <p>A. How many children (&lt;14 years old) live in your household?</p> <p>0 .....1</p> <p>1 .....2</p> <p>2 .....3</p> <p>3 or more .....4</p> <p><i>B. &lt;If 1 or more children in household&gt;</i></p> <p>Of the children in your household, do any fall under the following categories:</p> <p>Currently suffering from TB, as diagnosed by a HCP or health worker .....1</p> <p>Currently receiving preventative TB treatment.....2</p> <p>None of the above .....3</p> <p><b>MUST RECRUIT AT LEAST n=2 WITH CHILDREN SUFFERING FROM OR TAKING PREVENTATIVE TREATMENT FOR TB; REFER TO QUOTA TABLE</b></p> |
| <p><b>S10.</b></p> | <p>What type of healthcare coverage do you have access to?</p> <p>Private.....1</p> <p>Public .....2</p> <p><b>RECRUIT MIX OF COVERAGE</b></p>                                                                                                                                                                                                                                                                                                                                                                                                                                                                   |
| <p><b>S11.</b></p> | <p>Socio-economic status</p> <p><i>&lt;insert country specific questions from appendix&gt;</i></p> <p><b>RECRUIT MIX</b></p>                                                                                                                                                                                                                                                                                                                                                                                                                                                                                     |
| <p><b>S12.</b></p> | <p><b>ALL EXCEPT SA</b></p> <p>In what type of area is your main place of residence? If you are currently staying in a hospital, please consider the place where you would normally live</p> <p>Urban .....1</p> <p><i>Inner city dwelling</i></p> <p>Suburban .....2</p> <p><i>Outer city dwelling, on outskirts of city</i></p> <p>Rural.....3</p> <p><i>Dwelling outside of a town or city</i></p> <p><b>RECRUIT MIX; REFER TO QUOTA TABLE</b></p>                                                                                                                                                            |

|                    |                                                                                                                                                                                                                                                                                                                                                                                                                                                                                                                                                                                                                                                                                                                                                                                                                                                        |
|--------------------|--------------------------------------------------------------------------------------------------------------------------------------------------------------------------------------------------------------------------------------------------------------------------------------------------------------------------------------------------------------------------------------------------------------------------------------------------------------------------------------------------------------------------------------------------------------------------------------------------------------------------------------------------------------------------------------------------------------------------------------------------------------------------------------------------------------------------------------------------------|
| <p><b>S13.</b></p> | <p>In what region are you based?</p> <p><i>&lt;insert local region list&gt;</i></p> <p><b>RECRUIT MIX OF REGIONS</b></p>                                                                                                                                                                                                                                                                                                                                                                                                                                                                                                                                                                                                                                                                                                                               |
| <p><b>S14.</b></p> | <p>Do you have access to the following?</p> <ul style="list-style-type: none"> <li>• A smart phone in which you are able to record/ upload videos</li> <li>• A webcam to be able to take part in a video-streamed interview</li> </ul> <p><b>RECORD RESPONSE</b></p> <p><b>NOTE: RESPONDENTS SHOULD BE PROVIDED WITH ACCESS TO TECHNOLOGY TO COMPLETE INTERVIEW IF REQUIRED; LIAISE WITH RESPONDENT TO ORGANISE ACCESS WHERE POSSIBLE</b></p>                                                                                                                                                                                                                                                                                                                                                                                                          |
| <p><b>S15.</b></p> | <p>We are also interested in gaining the views of others close to you, for example members of your family or household, within the interview/ task to further understand your experience of living with TB.</p> <p>a) Would you be willing to include others close to you, such as your household, within the interview and/ or video tasks?</p> <p>Yes.....1</p> <p>No .....2</p> <p>IF YES:</p> <p>b) How many additional people will participate?</p> <p>_____</p> <p>c) Of these additional people, will any participants be under 14 years old (at the time of interview)?</p> <p>Yes.....1</p> <p>No .....2</p> <p><b>RECORD RESPONSE;</b></p> <p><b>IF YES, SHARE ADDITIONAL CONSENT FORM TO ALL ADDITIONAL RESPONDENTS;</b></p> <p><b>IF CHILDREN INCLUDED, ENSURE EXPLICIT CONSENT GAINED FROM BOTH CHILD RESPONDENT AND THEIR PARENT</b></p> |

## Socio-Economic Status – Country Specific Questions

*TO BE INSERTED AT S12 ACCORDING TO COUNTRY*

|                                    |                                                     |   |
|------------------------------------|-----------------------------------------------------|---|
| <b>INDIA</b>                       | What is your total household income per annum?      |   |
|                                    | < ₹ 2,50,000 .....                                  | 1 |
|                                    | ₹ 2,50,001-₹ 5,00,000.....                          | 2 |
|                                    | ₹ 5,00,001-₹ 7,50,000.....                          | 3 |
|                                    | ₹ 7,50,001-₹ 10,00,000.....                         | 4 |
|                                    | ₹ 10,00,001-₹ 12,00,000.....                        | 5 |
|                                    | ₹ 12,00,001-₹ 15,00,000.....                        | 6 |
|                                    | ₹ 15,00,001-₹ 18,00,000.....                        | 7 |
|                                    | ₹ 18,00,001-₹ 20,00,000.....                        | 8 |
|                                    | > ₹ 20,00,000 .....                                 | 9 |
|                                    | <b>RECRUIT MIX, AS PER LOCAL SES SCORING SYSTEM</b> |   |
|                                    | Postgraduate/ Master's degree/ Doctorate .....      | 1 |
|                                    | Graduate/ Bachelor's degree .....                   | 2 |
|                                    | Attended university but did not complete .....      | 3 |
|                                    | Completed Diploma/ Technical Course .....           | 4 |
| Intermediate/ Up to grade 12 ..... | 5                                                   |   |
| High School/ Up to grade 10 .....  | 6                                                   |   |
| Primary (Up to grade 5) .....      | 7                                                   |   |

|               |                                                                                                                                                                                                                                                                                                                                                                                                                                                                                                                                                                              |
|---------------|------------------------------------------------------------------------------------------------------------------------------------------------------------------------------------------------------------------------------------------------------------------------------------------------------------------------------------------------------------------------------------------------------------------------------------------------------------------------------------------------------------------------------------------------------------------------------|
| <b>RUSSIA</b> | <p>Which statement more accurately describes the financial situation of your family? &lt; 10,000 rubles..... 1</p> <p>Not enough money for food..... 1</p> <p>Enough money for food but buying clothes is difficult ..... 2</p> <p>Enough money for food and clothes but not enough for household appliances ..... 3</p> <p>Enough money to buy household appliances, but not enough to buy a new car ..... 4</p> <p>Enough money for all purchases except real estate..... 5</p> <p>No financial difficulties ..... 6</p> <p><b>RECRUIT MIX (LIKELY CODES 1-4 ONLY)</b></p> |
|               | <p>What is the highest level of education that you have completed?</p> <p>Incomplete secondary education (less than 11 classes) ..... 1</p> <p>Secondary general education (11 classes of the school)..... 2</p> <p>Specialized secondary (professional) education ..... 3</p> <p>Unfinished higher (three years or more)..... 4</p> <p>Higher education (bachelor, specialist, master)..... 5</p> <p>Academic degree (candidate of sciences, doctor of sciences) ..... 6</p>                                                                                                |

|                                         |                                                                        |   |
|-----------------------------------------|------------------------------------------------------------------------|---|
| <b>CHINA</b>                            | <b>What is your total household income per annum?</b>                  |   |
|                                         | <RMB50,000 .....                                                       | 1 |
|                                         | RMB50,000-RMB79,999 .....                                              | 2 |
|                                         | RMB80,000-RMB159,999 .....                                             | 3 |
|                                         | RMB160,000-RMB239,999 .....                                            | 4 |
|                                         | RMB240,000-RMB319,999 .....                                            | 5 |
|                                         | RMB320,000-RMB399,999 .....                                            | 6 |
|                                         | RMB400,000-RMB499,999 .....                                            | 7 |
|                                         | RMB500,000-RMB599,999 .....                                            | 8 |
|                                         | > RMB600,000 .....                                                     | 9 |
|                                         | <b>RECRUIT MIX (LIKELY CODES 2-6)</b>                                  |   |
|                                         | <b>What is the highest level of education that you have completed?</b> |   |
|                                         | Master's degree/ Doctorate .....                                       | 1 |
|                                         | Bachelor's degree .....                                                | 2 |
|                                         | Higher education .....                                                 | 3 |
| High school diploma or equivalent ..... | 4                                                                      |   |
| Less than high school diploma.....      | 5                                                                      |   |



**RECRUITER:** please identify LSM category using the following flow diagram and then confirm using the income brackets below

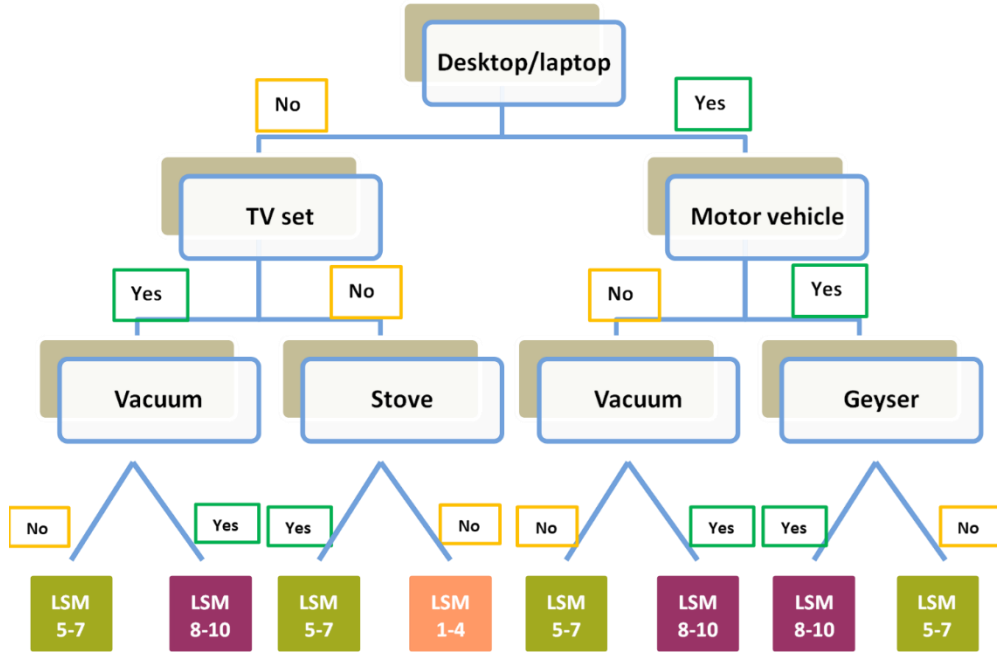

What is your total household income per month?

|                         | LSM: |
|-------------------------|------|
| Up to R3 330.....1      | 1-4  |
| R3 331 – R5 115.....2   | 5    |
| R5 116 – R8 615.....3   | 6    |
| R8 616 – R12 650.....4  |      |
| R12 651 – 20 030.....5  | 8    |
| R20 031 – R25 180.....6 | 9    |
| R25 181+.....7          | 10   |

**RECRUIT MIX OF LIVING STANDARD MEASUREMENT (LSM) SCORES**

**BRAZIL**

I will now ask you a few questions about items in your household, for economic classification purposes. All electrical/ electronic items I will mention must be in working condition, including any items that are stored. In case an item is not working, please include it only if you intend to have it fixed or replaced within the next six months.

**INSTRUCTION: All items must be asked by the interviewer and answered by the respondent**

*In your household, there is/ are \_\_\_\_\_*

| The water used in this household comes from...? |                                           |
|-------------------------------------------------|-------------------------------------------|
| 1                                               | The utility company's distribution system |
| 2                                               | Well or spring                            |
| 3                                               | Other                                     |

| Considering the stretch of street your household is at, you would say your street is...: |               |
|------------------------------------------------------------------------------------------|---------------|
| 1                                                                                        | Asphalt/Paved |
| 2                                                                                        | Dirt/Gravel   |

| COMFORT ITEMS                                                                                                                              | NOT OWNED | NUMBER IN HOUSEHOLD |   |   |    |
|--------------------------------------------------------------------------------------------------------------------------------------------|-----------|---------------------|---|---|----|
|                                                                                                                                            |           | 1                   | 2 | 3 | 4+ |
| Number of passenger cars exclusively for personal (i.e., not professional) use                                                             |           |                     |   |   |    |
| Number of monthly servants, including only those who work at least five days a week                                                        |           |                     |   |   |    |
| Number of washing machines, excluding tub washing machines                                                                                 |           |                     |   |   |    |
| Number of bathrooms, restrooms, powder rooms                                                                                               |           |                     |   |   |    |
| DVD Players, including any device that plays DVDs, and excluding Car DVD Players                                                           |           |                     |   |   |    |
| Number of refrigerators                                                                                                                    |           |                     |   |   |    |
| Number of stand-alone freezers, or freezers in two-door refrigerators                                                                      |           |                     |   |   |    |
| Number of personal computers, including desktop computers, laptops, notebooks and netbooks, and excluding tablets, palmtops or smartphones |           |                     |   |   |    |
| Number of dishwashers                                                                                                                      |           |                     |   |   |    |
| Number of microwave ovens                                                                                                                  |           |                     |   |   |    |
| Number of motorcycles, not considering those used exclusively for professional activities                                                  |           |                     |   |   |    |
| Number of clothes dryers, including washers-and-dryers                                                                                     |           |                     |   |   |    |

What is the householder's education?

|                                                           |                                                           |
|-----------------------------------------------------------|-----------------------------------------------------------|
| <i>Analfabeto / Fundamental I incompleto</i>              | No schooling / Incomplete Elementary School               |
| <i>Fundamental I completo / Fundamental II incompleto</i> | Elementary School Diploma / Incomplete Junior High School |
| <i>Fundamental completo/Médio incompleto</i>              | Junior High School Diploma / Incomplete High School       |
| <i>Médio completo/Superior incompleto</i>                 | High School Diploma / Incomplete Higher Education         |
| <i>Superior completo</i>                                  | Higher Education Degree                                   |

POINTS SYSTEM

|                       | Number of Items |   |   |    |        |
|-----------------------|-----------------|---|---|----|--------|
|                       | 0               | 1 | 2 | 3  | 4 or + |
| Bathroom(s)           | 0               | 3 | 7 | 10 | 14     |
| Domestic servant(s)   | 0               | 3 | 7 | 10 | 13     |
| Automobile(s)         | 0               | 3 | 5 | 8  | 11     |
| Personal computers(s) | 0               | 3 | 6 | 8  | 11     |
| Dishwasher(s)         | 0               | 3 | 6 | 6  | 6      |
| Refrigerator(s)       | 0               | 2 | 3 | 5  | 5      |
| Freezer(s)            | 0               | 2 | 4 | 6  | 6      |
| Washing machine(s)    | 0               | 2 | 4 | 6  | 6      |
| DVD player(s)         | 0               | 1 | 3 | 4  | 6      |
| Microwave oven(s)     | 0               | 2 | 4 | 4  | 4      |
| Motorcycle(s)         | 0               | 1 | 3 | 3  | 3      |
| Clothes dryer(s)      | 0               | 2 | 2 | 2  | 2      |

| Householder's education                                   |   |
|-----------------------------------------------------------|---|
| No schooling / Incomplete Elementary School               | 0 |
| Elementary School Diploma / Incomplete Junior High School | 1 |
| Junior High School Diploma / Incomplete High School       | 2 |
| High School Diploma / Incomplete Higher Education         | 4 |
| Higher Education Degree                                   | 7 |

| Public Utility Services |    |     |
|-------------------------|----|-----|
|                         | No | Yes |
| Piped water             | 0  | 4   |
| Paved street            | 0  | 2   |

| THRESHOLDS |               |
|------------|---------------|
| A .....    | 45-100 points |
| B1.....    | 38-44 points  |
| B2.....    | 29-37 points  |
| C1.....    | 23-28 points  |
| C2.....    | 17-22 points  |
| D-E .....  | 0-16 points   |
